# Supplementary material for: Summary of Research: Collaboration Between Healthcare Professionals and People with Multiple Sclerosis to Develop Communication Tools to Improve the Standard of Multiple Sclerosis Care
Source: PubMed Central journal article supplement — Adv Ther. 2023 Oct 9;40(12):5131–6. doi: 10.1007/s12325-023-02638-3 (PMC10611820; doi:10.1007/s12325-023-02638-3), 2023-10-09

## Supplementary Material

**Summary of Research:** Collaboration Between Healthcare Professionals and People with Multiple Sclerosis to Develop Communication Tools to Improve the Standard of Multiple Sclerosis Care

**Author names:**

Celia Oreja-Guevara<sup>\*1</sup>, Stanca Potra<sup>2</sup>, Birgit Bauer<sup>3</sup>, Diego Centonze<sup>4</sup>, Maria-Paz Giambastiani<sup>5</sup>, Gavin Giovannoni<sup>6</sup>, Jürg Kesselring<sup>7</sup>, Dawn Langdon<sup>8</sup>, Sarah Morrow<sup>9</sup>, Jocelyne Nouvet-Gire<sup>10</sup>, Maija Pontaga<sup>11</sup>, Peter Rieckmann<sup>12</sup>, Sven Schippling<sup>13</sup>, Nektaria Alexandri<sup>14</sup>, Jane Shanahan<sup>15</sup>, Heidi Thompson<sup>16</sup>, Pieter van Galen<sup>17</sup>, Patrick Vermersch<sup>18</sup>, David Yeandle<sup>19</sup>

**Author affiliations:**

<sup>1</sup>Servicio de Neurología, Hospital Clínico San Carlos, IdISSC, Departamento de Medicina, Universidad Complutense, Madrid, Spain

<sup>2</sup>Member of the MS in the 21st Century Steering Group, Bucharest, Romania

<sup>3</sup>Member of the MS in the 21st Century Steering Group, Berlin, Germany

<sup>4</sup>Unit of Neurology, IRCCS Neuromed, Pozzilli, IS, Italy

<sup>5</sup>Member of the MS in the 21st Century Steering Group, Bilbao, Spain

<sup>6</sup>Blizard Institute, Barts and the London School of Medicine and Dentistry, London, UK

<sup>7</sup>Department of Neurology and Neurorehabilitation, Kliniken Valens, Valens, Switzerland

<sup>8</sup>Royal Holloway, University of London, London, UK

<sup>9</sup>Western University, London, ON, Canada

<sup>10</sup>Member of the MS in the 21st Century Steering Group, Paris, France

<sup>11</sup>Member of the MS in the 21st Century Steering Group, Riga, Latvia

<sup>12</sup>Medical Park, Loipl, Bischofswiesen, Germany

<sup>13</sup>Universitätsspital Zürich, Zurich, Switzerland

<sup>14</sup>Global Medical Affairs, Neurology and Immunology, the healthcare business of Merck KGaA, Darmstadt, Germany

<sup>15</sup>Member of the MS in the 21st Century Steering Group, Ascot, UK

<sup>16</sup>Craigavon Hospital, Portadown, UK

<sup>17</sup>Member of the MS in the 21st Century Steering Group, Brussels, Belgium

<sup>18</sup>University of Lille, Inserm U1172 LiINCog, CHU Lille, FHU Precise, Lille, France

<sup>19</sup>Member of the MS in the 21st Century Steering Group, Southampton, UK

**ORCID iD:**

Celia Oreja-Guevara: <https://orcid.org/0000-0002-9221-5716>

Stanca Potra: N/A

Birgit Bauer: <https://orcid.org/0000-0002-2475-2042>

Diego Centonze: <https://orcid.org/0000-0002-8390-8545>

Maria-Paz Giambastiani: <https://orcid.org/0000-0003-2628-6687>

Gavin Giovannoni: <https://orcid.org/0000-0001-9995-1700>

Jürg Kesselring: <https://orcid.org/0000-0002-8645-7364>

Dawn Langdon: <https://orcid.org/0000-0003-1128-7417>

Sarah Morrow: <https://orcid.org/0000-0001-7522-6440>

Jocelyne Nouvet-Gire: N/A

Maija Pontaga: N/A

Peter Rieckmann: <https://orcid.org/0000-0001-6921-0135>

Sven Schippling: <https://orcid.org/0000-0002-6804-1795>

Nektaria Alexandri: <https://orcid.org/0000-0002-9806-8358>

Jane Shanahan: N/A

Heidi Thompson: N/A

Pieter van Galen: <https://orcid.org/0000-0001-7074-2550>

Patrick Vermersch: <https://orcid.org/0000-0003-0997-8817>

David Yeandle: N/A

**Corresponding Author:**

Celia Oreja-Guevara

Servicio de Neurología, Hospital Clínico San Carlos, IdISSC, Departamento de Medicina, Universidad Complutense, Madrid, Spain

E-mail: [orejacbn@gmail.com](mailto:orejacbn@gmail.com)

Figure 1

Figure 1. myMS priorities: sample pages. This tool can be downloaded from the MS in the 21st century website [www.msinthe21stcentury.com](http://www.msinthe21stcentury.com)

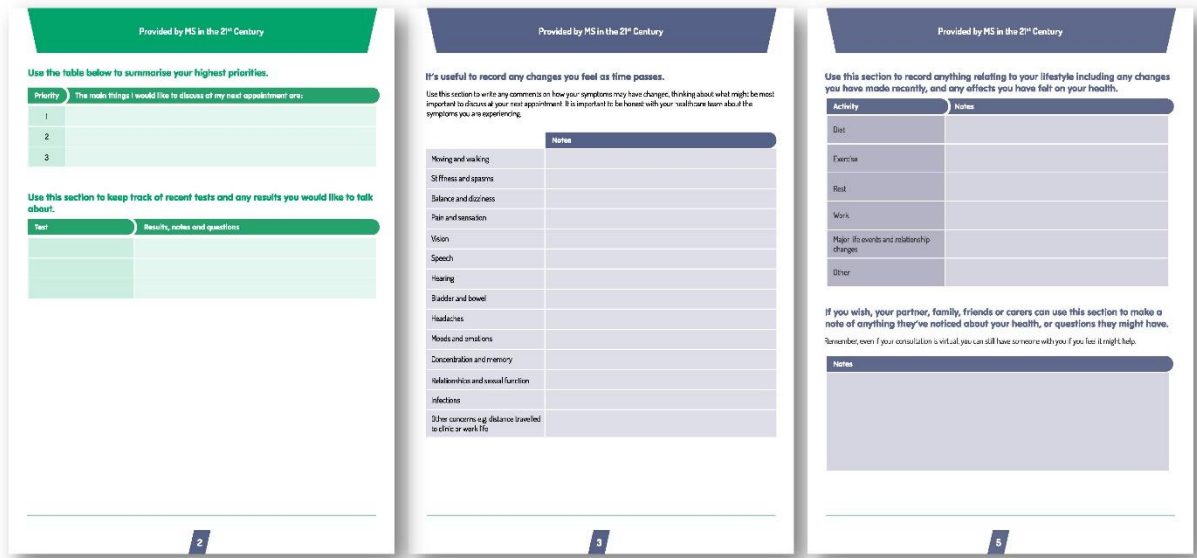

Figure 2

Figure 2. myMS commitments. This tool can be downloaded from the MS in the 21st century website [www.msinthe21stcentury.com](http://www.msinthe21stcentury.com)

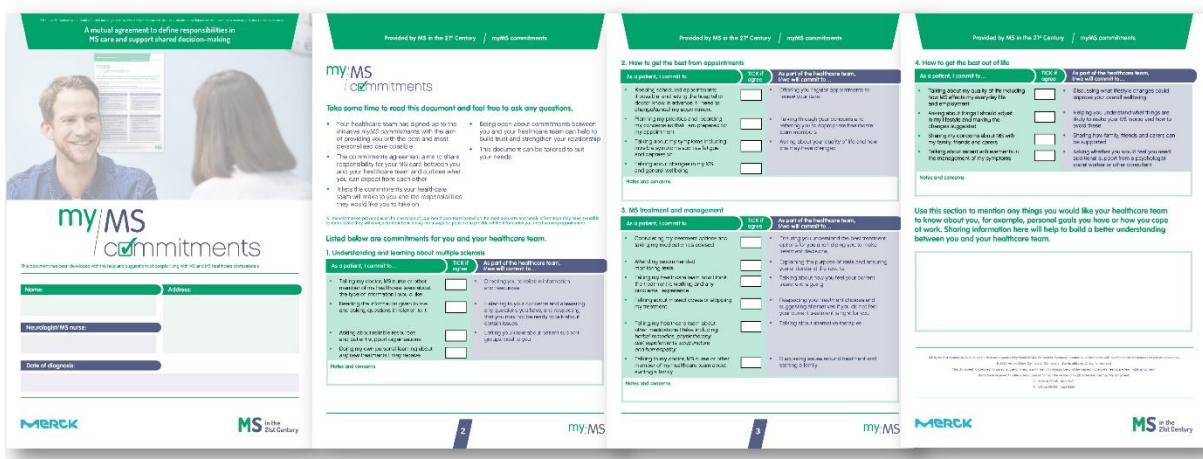

Supplement: 12325_2023_2638_MOESM1_ESM.pdf [file 12325_2023_2638_MOESM1_ESM.pdf]
